# Supplementary material
Source: PubMed Central journal article supplement (PMC7323003)
Supplement: NIHMS1593148-supplement-1.pdf [file NIHMS1593148-supplement-1.pdf]

**Supplementary Table S1.** Distribution of nutrition and lifestyle factors in men

| Variable | Categories            | Description                                    | N    | Weighted mean (SE) or proportion     |
|----------|-----------------------|------------------------------------------------|------|--------------------------------------|
| alc2day  | alcohol               | 2 or more drink per day (yes,no)               | 1316 | 95.61, 4.39                          |
| Hpylori  | bacterial infection   | Helicobacter pylori Ab (yes,no)                | 1276 | 66.46, 33.54                         |
| tetanus  | bacterial infection   | Tetanus Ab (U/mL)                              | 1316 | 1.098763 (0.06446)                   |
| caf2day  | caffeinated beverages | 2 or more caffeinated drink per day (yes,no)   | 1316 | 43.96, 56.04                         |
| aspi_mo  | drug use              | # aspirin taken in the past month (yes,no)     | 510  | <10: 68.39, 10-20: 12.67, ≥20: 18.94 |
| aspirin  | drug use              | Taken aspirin in past month (yes,no)           | 1311 | 54.03, 45.97                         |
| nsa_mo   | drug use              | # NSAIDs taken in the past month (yes,no)      | 171  | <10: 85.22, 10-20: 7.3, ≥20: 7.47    |
| nsaid    | drug use              | Taken NSAIDs in past month (yes,no)            | 1310 | 84.11, 15.89                         |
| pct      | drug use              | Taken paracetamol in past month (yes,no)       | 1310 | 69.96, 30.04                         |
| pct_mo   | drug use              | # paracetamol taken in the past month (yes,no) | 376  | <10: 86.79, 10-20: 4.9, ≥20: 8.31    |
| a_toco_g | food nutrient recall  | Alpha-tocopherol (mg)                          | 1273 | 9.249197 (0.258172)                  |
| alan_g   | food nutrient recall  | Alanine (gm)                                   | 1273 | 4.751602 (0.155424)                  |
| alco_g   | food nutrient recall  | Alcohol (gm)                                   | 1273 | 16.75585 (2.492959)                  |
| anprot_g | food nutrient recall  | Animal Protein (gm)                            | 1273 | 68.897855 (2.783329)                 |
| argin_g  | food nutrient recall  | Arginine (gm)                                  | 1273 | 5.460872 (0.168145)                  |
| ash_g    | food nutrient recall  | Ash (gm)                                       | 1273 | 21.194439 (0.514409)                 |
| aspac_g  | food nutrient recall  | Aspartic Acid (gm)                             | 1273 | 8.40544 (0.254058)                   |
| aspar_g  | food nutrient recall  | Aspartame (mg)                                 | 1273 | 53.338189 (4.633019)                 |
| b_toco_g | food nutrient recall  | Beta-tocopherol (mg)                           | 1273 | 0.337651 (0.020467)                  |

14  
15  
16  
17  
18  
19  
20  
21  
22  
23  
24  
25  
26  
27  
28  
29  
30  
31  
32  
33  
34  
35  
36  
37  
38  
39  
40  
41  
42  
43  
44  
45  
46  
47  
48  
49  
50  
51  
52  
53  
54  
55  
56  
57  
58  
59  
60  
61  
62  
63  
64  
65

|          |                      |                          |      |                          |
|----------|----------------------|--------------------------|------|--------------------------|
| bcaro_g  | food nutrient recall | Beta-carotene (mcg)      | 1273 | 3042.437793 (244.585966) |
| cafe_g   | food nutrient recall | Caffeine (mg)            | 1273 | 289.121669 (16.012104)   |
| calc_g   | food nutrient recall | Calcium (mg)             | 1273 | 918.402049 (26.892269)   |
| carb_g   | food nutrient recall | Total carbohydrates (gm) | 1273 | 310.152982 (7.470697)    |
| cfiber_g | food nutrient recall | Crude Fiber (gm)         | 1273 | 4.987894 (0.101506)      |
| chol_g   | food nutrient recall | Cholesterol (mg)         | 1273 | 354.037954 (14.952323)   |
| copp_g   | food nutrient recall | Copper (mg)              | 1273 | 1.685249 (0.0443)        |
| cyst_g   | food nutrient recall | Cystine (gm)             | 1273 | 1.283291 (0.037427)      |
| d_toco_g | food nutrient recall | Delta-tocopherol (mg)    | 1273 | 5.632767 (0.259652)      |
| fiber_g  | food nutrient recall | Dietary fiber (gm)       | 1273 | 19.833665 (0.40439)      |
| fola_g   | food nutrient recall | Folic acid (mcg)         | 1273 | 324.56759 (9.570629)     |
| fruc_g   | food nutrient recall | Fructose (gm)            | 1272 | 32.048955 (1.137372)     |
| g_toco_g | food nutrient recall | Gamma-tocopherol (mg)    | 1273 | 22.809025 (0.871755)     |
| gala_g   | food nutrient recall | Galactose (gm)           | 1273 | 0.19319 (0.022902)       |
| gluc_g   | food nutrient recall | Glucose (gm)             | 1273 | 34.001043 (1.281204)     |
| glutac_g | food nutrient recall | Glutamic Acid (gm)       | 1273 | 19.163247 (0.573767)     |
| glyc_g   | food nutrient recall | Glycine (gm)             | 1273 | 4.274716 (0.142044)      |

14  
15  
16  
17  
18  
19  
20  
21  
22  
23  
24  
25  
26  
27  
28  
29  
30  
31  
32  
33  
34  
35  
36  
37  
38  
39  
40  
41  
42  
43  
44  
45  
46  
47  
48  
49  
50  
51  
52  
53  
54  
55  
56  
57  
58  
59  
60  
61  
62  
63  
64  
65

|          |                      |                                        |      |                        |
|----------|----------------------|----------------------------------------|------|------------------------|
| histi_g  | food nutrient recall | Histidine (gm)                         | 1273 | 2.819857 (0.107981)    |
| ifiber_g | food nutrient recall | Water insoluble dietary fiber (gm)     | 1273 | 12.742525 (0.271874)   |
| iron_g   | food nutrient recall | Iron (mg)                              | 1273 | 18.446977 (0.324852)   |
| isoleu_g | food nutrient recall | Isoleucine (gm)                        | 1273 | 4.467264 (0.134656)    |
| kcal     | food nutrient recall | Calories (kcal)                        | 1273 | 2670.24349 (78.181559) |
| lact_g   | food nutrient recall | Lactose (gm)                           | 1273 | 15.458487 (0.97768)    |
| leuc_g   | food nutrient recall | Leucine (gm)                           | 1273 | 7.694177 (0.251869)    |
| lysin_g  | food nutrient recall | Lysine(gm)                             | 1273 | 6.776958 (0.228592)    |
| magn_g   | food nutrient recall | Magnesium (mg)                         | 1273 | 350.029025 (7.781465)  |
| malt_g   | food nutrient recall | Maltose (gm)                           | 1273 | 3.931091 (0.214201)    |
| meth_g   | food nutrient recall | Methionine (gm)                        | 1273 | 2.257171 (0.072023)    |
| mfa141_g | food nutrient recall | MFA 14:1 (gm)                          | 1273 | 0.075431 (0.008828)    |
| mfa161_g | food nutrient recall | MFA 16:1 (gm)                          | 1273 | 2.06091 (0.103387)     |
| mfa181_g | food nutrient recall | Oleic acid (MFA 18:1) (gm)             | 1273 | 38.339921 (1.527623)   |
| mfa201_g | food nutrient recall | MFA 20:1 (gm)                          | 1273 | 0.168113 (0.013458)    |
| mfa221_g | food nutrient recall | MFA 22:1 (gm)                          | 1273 | 0.015057 (0.00441)     |
| mufat_g  | food nutrient recall | Total monounsaturated fatty acids (gm) | 1273 | 41.044001 (1.64217)    |

14  
15  
16  
17  
18  
19  
20  
21  
22  
23  
24  
25  
26  
27  
28  
29  
30  
31  
32  
33  
34  
35  
36  
37  
38  
39  
40  
41  
42  
43  
44  
45  
46  
47  
48  
49  
50  
51  
52  
53  
54  
55  
56  
57  
58  
59  
60  
61  
62  
63  
64  
65

|          |                      |                                       |      |                       |
|----------|----------------------|---------------------------------------|------|-----------------------|
| niac_g   | food nutrient recall | Niacin (mg)                           | 1273 | 29.668338 (0.807561)  |
| oxal_g   | food nutrient recall | Oxalic Acid (mg)                      | 1273 | 359.406367 (14.39432) |
| p_alc    | food nutrient recall | Energy from alcohol (%kcal)           | 1273 | 4.055785 (0.408062)   |
| p_carb   | food nutrient recall | Energy from carbohydrate (%kcal)      | 1273 | 47.274056 (0.5871)    |
| p_msfat  | food nutrient recall | Energy from monosaturated fat (%kcal) | 1273 | 13.395245 (0.181296)  |
| p_prot   | food nutrient recall | Energy from protein (%kcal)           | 1273 | 15.248454 (0.19076)   |
| p_psfat  | food nutrient recall | Energy from polysaturated fat (%kcal) | 1273 | 6.753288 (0.186041)   |
| p_sfat   | food nutrient recall | Energy from saturated fat (%kcal)     | 1273 | 11.899081 (0.227194)  |
| p_tfat   | food nutrient recall | Energy from total fat (%kcal)         | 1273 | 34.711743 (0.35868)   |
| pantho_g | food nutrient recall | Pantothenic acid (mg)                 | 1273 | 5.705518 (0.167879)   |
| pect_g   | food nutrient recall | Pectin (gm)                           | 1273 | 2.199385 (0.076521)   |
| pfa182_g | food nutrient recall | Linoleic acid (PFA 18:2) (gm)         | 1273 | 18.079663 (0.570601)  |
| pfa183_g | food nutrient recall | Linolenic acid (PFA 18:3) (gm)        | 1273 | 1.682609 (0.048901)   |
| pfa184_g | food nutrient recall | PFA 18:4 (gm)                         | 1273 | 0.004451 (0.001625)   |
| pfa204_g | food nutrient recall | PFA 20:4 (gm)                         | 1273 | 0.175944 (0.007247)   |
| pfa205_g | food nutrient recall | PFA 20:5 (gm)                         | 1273 | 0.055391 (0.007491)   |
| pfa225_g | food nutrient recall | PFA 22:5 (gm)                         | 1273 | 0.022222 (0.004543)   |

14  
15  
16  
17  
18  
19  
20  
21  
22  
23  
24  
25  
26  
27  
28  
29  
30  
31  
32  
33  
34  
35  
36  
37  
38  
39  
40  
41  
42  
43  
44  
45  
46  
47  
48  
49  
50  
51  
52  
53  
54  
55  
56  
57  
58  
59  
60  
61  
62  
63  
64  
65

|          |                      |                                        |      |                         |
|----------|----------------------|----------------------------------------|------|-------------------------|
| pfa226_g | food nutrient recall | PFA 22:6 (gm)                          | 1273 | 0.121006 (0.019992)     |
| phen_g   | food nutrient recall | Phenylalanine (gm)                     | 1273 | 4.292742 (0.133368)     |
| phos_g   | food nutrient recall | Phosphorous (mg)                       | 1273 | 1532.653562 (43.764485) |
| phyt_g   | food nutrient recall | Phytic Acid (mg)                       | 1273 | 757.515328 (22.282383)  |
| pots_g   | food nutrient recall | Potassium (mg)                         | 1273 | 3197.403488 (71.01591)  |
| proli_g  | food nutrient recall | Proline (gm)                           | 1273 | 6.440663 (0.214495)     |
| prot_g   | food nutrient recall | Protein (gm)                           | 1273 | 99.104249 (3.093264)    |
| pufat_g  | food nutrient recall | Total polyunsaturated fatty acids (gm) | 1273 | 20.29242 (0.601323)     |
| retino_g | food nutrient recall | Retinol (mcg)                          | 1273 | 629.028869 (56.332475)  |
| ribo_g   | food nutrient recall | Riboflavin (mg)                        | 1273 | 2.385787 (0.07973)      |
| sacch_g  | food nutrient recall | Saccharin (mg)                         | 1273 | 5.459063 (0.981623)     |
| satfat_g | food nutrient recall | Total saturated fatty acids (gm)       | 1273 | 36.171417 (1.48297)     |
| sele_g   | food nutrient recall | Selenium (mcg)                         | 1273 | 147.678733 (3.503391)   |
| serin_g  | food nutrient recall | Serine (gm)                            | 1273 | 4.402773 (0.136669)     |
| sfa100_g | food nutrient recall | SFA 10:0 (gm)                          | 1273 | 0.56396 (0.022099)      |
| sfa120_g | food nutrient recall | SFA 12:0 (gm)                          | 1273 | 1.300459 (0.066651)     |
| sfa140_g | food nutrient recall | SFA 14:0 (gm)                          | 1273 | 3.039299 (0.12636)      |

14  
15  
16  
17  
18  
19  
20  
21  
22  
23  
24  
25  
26  
27  
28  
29  
30  
31  
32  
33  
34  
35  
36  
37  
38  
39  
40  
41  
42  
43  
44  
45  
46  
47  
48  
49  
50  
51  
52  
53  
54  
55  
56  
57  
58  
59  
60  
61  
62  
63  
64  
65

|          |                      |                                  |      |                          |
|----------|----------------------|----------------------------------|------|--------------------------|
| sfa160_g | food nutrient recall | SFA 16:0 (gm)                    | 1273 | 19.438326 (0.826895)     |
| sfa170_g | food nutrient recall | SFA 17:0 (gm)                    | 1273 | 0.00102 (0.000305)       |
| sfa180_g | food nutrient recall | SFA 18:0 (gm)                    | 1273 | 9.705042 (0.414024)      |
| sfa200_g | food nutrient recall | SFA 20:0 (gm)                    | 1273 | 0.027588 (0.005434)      |
| sfa220_g | food nutrient recall | SFA 22:0 (gm)                    | 1273 | 0.047146 (0.009417)      |
| sfa40_g  | food nutrient recall | SFA 4:0 (gm)                     | 1273 | 0.621466 (0.029625)      |
| sfa60_g  | food nutrient recall | SFA 6:0 (gm)                     | 1273 | 0.309018 (0.015594)      |
| sfa80_g  | food nutrient recall | SFA 8:0 (gm)                     | 1273 | 0.303436 (0.013216)      |
| sfiber_g | food nutrient recall | Water soluble dietary fiber (gm) | 1273 | 6.88882 (0.142873)       |
| sodi_g   | food nutrient recall | Sodium (mg)                      | 1273 | 4274.007199 (110.451375) |
| star_g   | food nutrient recall | Starch (gm)                      | 1273 | 136.053812 (4.006875)    |
| sucr_g   | food nutrient recall | Sucrose (gm)                     | 1273 | 59.443801 (2.800659)     |
| thia_g   | food nutrient recall | Thiamin (mg)                     | 1273 | 2.084366 (0.059003)      |
| thre_g   | food nutrient recall | Threonine (gm)                   | 1273 | 1.147221 (0.032231)      |
| totfat_g | food nutrient recall | Total fats (gm)                  | 1273 | 105.451527 (3.682274)    |
| tryp_g   | food nutrient recall | Tryptophan (gm)                  | 1273 | 1.147221 (0.032231)      |
| tyro_g   | food nutrient recall | Tyrosine (gm)                    | 1273 | 3.527363 (0.119926)      |

14  
15  
16  
17  
18  
19  
20  
21  
22  
23  
24  
25  
26  
27  
28  
29  
30  
31  
32  
33  
34  
35  
36  
37  
38  
39  
40  
41  
42  
43  
44  
45  
46  
47  
48  
49  
50  
51  
52  
53  
54  
55  
56  
57  
58  
59  
60  
61  
62  
63  
64  
65

|           |                      |                                         |      |                          |
|-----------|----------------------|-----------------------------------------|------|--------------------------|
| valin_g   | food nutrient recall | Valine (gm)                             | 1273 | 5.021192 (0.153526)      |
| vit_a_g   | food nutrient recall | Total vitamin A (IU)                    | 1273 | 7174.651052 (490.078152) |
| vit_b6_g  | food nutrient recall | Vitamin B6 (mg)                         | 1273 | 2.217218 (0.048083)      |
| vit_c_g   | food nutrient recall | Vitamin C (mg)                          | 1273 | 100.189626 (4.637102)    |
| vit_d_g   | food nutrient recall | Vitamin D (mcg)                         | 1273 | 5.484227 (0.220845)      |
| vit_e_g   | food nutrient recall | Total alpha-tocopherol equivalents (mg) | 1273 | 11.728389 (0.329232)     |
| vitb12_g  | food nutrient recall | Vitamin B12 (mcg)                       | 1273 | 7.215981 (0.454379)      |
| vprot_g   | food nutrient recall | Vegetable Protein (gm)                  | 1273 | 28.622574 (0.739136)     |
| water_g   | food nutrient recall | Water (gm)                              | 1273 | 2424.499226 (69.51972)   |
| zinc_g    | food nutrient recall | Zinc (mg)                               | 1273 | 14.462347 (0.537058)     |
| cho_hei   | healthy eating index | Cholesterol, HEI Score                  | 1273 | 6.398321 (0.223666)      |
| dai_hei   | healthy eating index | Dairy, HEI Score                        | 1273 | 6.668739 (0.196456)      |
| fat_hei   | healthy eating index | Fats, HEI Score                         | 1273 | 6.110421 (0.140767)      |
| fru_hei   | healthy eating index | Fruits, HEI Score                       | 1273 | 3.513191 (0.179638)      |
| gra_hei   | healthy eating index | Grains, HEI Score                       | 1273 | 6.691145 (0.110348)      |
| HEISCOR E | healthy eating index | Healthy Eating Index Score              | 1273 | 61.825724 (0.647717)     |
| mea_hei   | healthy eating index | Meats, HEI Score                        | 1273 | 7.779143 (0.081918)      |

14  
15  
16  
17  
18  
19  
20  
21  
22  
23  
24  
25  
26  
27  
28  
29  
30  
31  
32  
33  
34  
35  
36  
37  
38  
39  
40  
41  
42  
43  
44  
45  
46  
47  
48  
49  
50  
51  
52  
53  
54  
55  
56  
57  
58  
59  
60  
61  
62  
63  
64  
65

|          |                      |                                               |      |                                                 |
|----------|----------------------|-----------------------------------------------|------|-------------------------------------------------|
| sfa_hei  | healthy eating index | Saturated Fat, HEI Score                      | 1273 | 5.858953 (0.252637)                             |
| sod_hei  | healthy eating index | Sodium, HEI Score                             | 1273 | 4.634559 (0.150713)                             |
| veg_hei  | healthy eating index | Vegetables, HEI Score                         | 1273 | 6.082206 (0.141065)                             |
| a_carot  | nutrients/mineral    | Serum alpha carotene (umol/L)                 | 1307 | 0.073402 (0.003387)                             |
| b_carot  | nutrients/mineral    | Serum beta carotene (umol/L)                  | 1307 | 0.296075 (0.013846)                             |
| b_crypto | nutrients/mineral    | Serum beta cryptoxanthin (umol/L)             | 1307 | 0.147939 (0.004687)                             |
| ca_norm  | nutrients/mineral    | Serum normalized calcium (mmol/L)             | 1157 | 1.233416 (0.003035)                             |
| ca_tot   | nutrients/mineral    | Serum total calcium (mmol/L)                  | 1304 | 2.294228 (0.006598)                             |
| cadmium  | nutrients/mineral    | Urine cadmium (umol/L)                        | 1294 | 6.528018 (0.25601)                              |
| folate_r | nutrients/mineral    | RBC folate (nmol/L)                           | 1308 | 419.486708 (9.823217)                           |
| folate_s | nutrients/mineral    | Serum folate (nmol/L)                         | 1316 | 12.605811 (0.451136)                            |
| iodine   | nutrients/mineral    | Urine iodine (ug/dL)                          | 1279 | 27.929832 (8.010699)                            |
| lead     | nutrients/mineral    | Serum lead (umol/L)                           | 1316 | 0.251097 (0.012118)                             |
| lut_zea  | nutrients/mineral    | Serum lutein/zeaxanthin (umol/L)              | 1307 | 0.408457 (0.013083)                             |
| lycopene | nutrients/mineral    | Serum lycopene (umol/L)                       | 1307 | 0.46946 (0.011235)                              |
| phosp    | nutrients/mineral    | Serum phosphorus (mmol/L)                     | 1310 | 1.040831 (0.004768)                             |
| selenium | nutrients/mineral    | Serum selenium (mmol/L)                       | 1314 | 1.592166 (0.014396)                             |
| sum_ret  | nutrients/mineral    | Serum sum retinyl esters (umol/L)             | 1307 | 0.198827 (0.008189)                             |
| vit_a    | nutrients/mineral    | Serum vit A (umol/L)                          | 1307 | 2.211591 (0.019225)                             |
| vit_c    | nutrients/mineral    | Serum vit C (mmol/L)                          | 1302 | 37.54998 (1.307739)                             |
| vit_d    | nutrients/mineral    | Serum vitamin D (nmol/L)                      | 1315 | 78.31879 (1.849005)                             |
| vit_e    | nutrients/mineral    | Serum vit E (umol/L)                          | 1307 | 25.452745 (0.329354)                            |
| toxop    | parasite infection   | Toxoplasmosis Ab (yes,no)                     | 1211 | 22.421784 (2.859353)                            |
| vig      | physical activity    | Vigorous physical activity (no, yes)          | 1316 | 88.81, 11.19                                    |
| age_stop | smoking              | Age last smoke cigarettes regularly (years)   | 226  | <25: 34.81, 25-35: 39.03, ≥35: 26.16            |
| chewsnu  | smoking              | Ever used chewing tobacco or snuff (yes,no)   | 1316 | 81.45, 18.55                                    |
| cig_100  | smoking              | Smoked 100+ cigarettes in life (yes,no)       | 1316 | 34.37, 65.63                                    |
| cig_age  | smoking              | Age first smoked cigarette regularly (yes,no) | 836  | <30: 99.23, 30-40: 0.69, 40-50: 0.03, ≥50: 0.05 |



14  
15  
16  
17  
18  
19  
20  
21  
22  
23  
24  
25  
26  
27  
28  
29  
30  
31  
32  
33  
34  
35  
36  
37  
38  
39  
40  
41  
42  
43  
44  
45  
46  
47  
48  
49  
50  
51  
52  
53  
54  
55  
56  
57  
58  
59  
60  
61  
62  
63  
64  
65

|           |                 |                                                                 |      |                                                   |
|-----------|-----------------|-----------------------------------------------------------------|------|---------------------------------------------------|
| cig_day   | smoking         | # cigarettes smoked per day                                     | 377  | <2: 0.85, 2-10: 14.43, 10-20: 21.27, ≥20: 63.46   |
| cig_dmax  | smoking         | # cigarettes per day when smoking most                          | 140  | <10: 3.15, 10-20: 10.22, 20-50: 64.96, ≥50: 21.67 |
| cig_form  | smoking         | Former smoking (vs never smoking)                               | 901  | 51.96, 48.04                                      |
| cig_now   | smoking         | Current smoking (vs never smoking)                              | 872  | 50.38, 49.62                                      |
| cigar_20  | smoking         | Ever smoked at least 20 cigars in life (yes,no)                 | 1316 | 70.71, 29.29                                      |
| COP       | smoking         | Cotinine (ng/mL)                                                | 1309 | 98.594524 (6.392028)                              |
| fcig_day  | smoking         | # cigarettes smoked per day before quitting                     | 421  | <2: 0.25, 2-10: 14.77, 10-20: 16.18, ≥20: 68.8    |
| pipe_20   | smoking         | Ever smoked 20 pipes of tobacco in life (yes,no)                | 1315 | 76.27, 23.73                                      |
| SHS       | smoking         | Secondhand smoking (vs no secondhand smoking)                   | 457  | 7.13, 92.87                                       |
| SHS_home  | smoking         | Does anyone smoke in the home (yes,no)                          | 1316 | 59.27, 40.73                                      |
| SHS_work  | smoking         | Can smell smoking in the office (yes,no)                        | 858  | 44.99, 55.01                                      |
| smoke_hm  | smoking         | # persons who smoke cigarettes in home                          | 1316 | <2: 81.46, 2-4: 17.65, ≥4: 0.89                   |
| smoke_ofc | smoking         | At work, hours per day can smell smoking (yes,no)               | 427  | 1-3: 36.35, 3-5: 10.53, ≥5: 53.12                 |
| y_cig     | smoking         | Years smoked this amount (years)                                | 395  | <5: 21.06, 5-10: 15.33, 10-20: 35.44, ≥20: 28.17  |
| meet_yr   | social support  | # get together with friends or relatives or neighbours per year | 1316 | <12: 5.24, 12-48: 12.77, ≥48: 81.99               |
| phone_wk  | social support  | # talk on the phone with family, friends or neighbours per week | 1243 | <2: 24.9, 2-7: 33.74, ≥7: 41.36                   |
| HA_ab     | viral infection | Hepatitis A Ab (yes,no)                                         | 1313 | 63.89, 36.11                                      |
| HBc_ab    | viral infection | Hepatitis B core Ab (yes,no)                                    | 1314 | 92.75, 7.25                                       |
| HBs_ab    | viral infection | Hepatitis B surface Ab (yes,no)                                 | 101  | 11.9, 88.1                                        |
| HC_ab     | viral infection | Hepatitis C Ab (yes,no)                                         | 1310 | 98.57, 1.43                                       |
| HSV1      | viral infection | HSV I Ab (yes,no)                                               | 1310 | 32.65, 67.35                                      |
| HSV2      | viral infection | HSV II Ab (yes,no)                                              | 1304 | 79.84, 20.16                                      |
| rubella   | viral infection | Rubella Ab (yes,no)                                             | 1313 | 119.801564 (3.802838)                             |
| vcella    | viral infection | Varicella Ab (yes,no)                                           | 1313 | 13.747675 (0.400698)                              |

**Supplementary Table S2.** Associations between nutrition and lifestyle factors and T deficiency in the discovery set. All models were adjusted for age, race/ethnicity, education, and PIR. P-values for trend are shown for ordinal variables. Benjamin—Hochberg adjusted P-values for FDR < 5% are shown.

| Variable  | Description                                       | nTotal | nLowT | OR    | lower CI | upper CI | P-value |
|-----------|---------------------------------------------------|--------|-------|-------|----------|----------|---------|
| cig_100   | Smoked 100+ cigarettes in life (yes,no)           | 1316   | 243   | 0.798 | 0.3682   | 1.7295   | 0.75    |
| cig_age   | Age first smoked cigarette regularly (yes,no)     | 836    | 162   | 1.975 | 0.3351   | 11.641   | 0.67    |
| cig_now   | Current smoking (vs never smoking)                | 872    | 112   | 0.447 | 0.1687   | 1.1866   | 0.35    |
| cig_form  | Former smoking (vs never smoking)                 | 901    | 208   | 1.017 | 0.4608   | 2.2466   | 0.99    |
| SHS       | Secondhand smoking (vs no secondhand smoking)     | 457    | 77    | 0.328 | 0.0882   | 1.2189   | 0.33    |
| cig_day   | # cigarettes smoked per day                       | 377    | 33    | 0.821 | 0.4877   | 1.3827   | 0.67    |
| y_cig     | Years smoked this amount (years)                  | 395    | 34    | 0.806 | 0.5103   | 1.2738   | 0.62    |
| cig_dma   | # cigarettes per day when smoking most            | 140    | 14    | 1.397 | 0.4732   | 4.1259   | 0.74    |
| age_sto   | Age last smoke cigarettes regularly (years)       | 226    | 54    | 0.724 | 0.3699   | 1.4186   | 0.62    |
| fcig_day  | # cigarettes smoked per day before quitting       | 421    | 127   | 0.889 | 0.6172   | 1.2816   | 0.74    |
| chewsn    | Ever used chewing tobacco or snuff (yes,no)       | 1316   | 243   | 1.121 | 0.6885   | 1.8265   | 0.78    |
| cigar_20  | Ever smoked at least 20 cigars in life (yes,no)   | 1316   | 243   | 0.682 | 0.4197   | 1.1079   | 0.36    |
| pipe_20   | Ever smoked 20 pipes of tobacco in life (yes,no)  | 1315   | 243   | 0.693 | 0.4392   | 1.0946   | 0.36    |
| SHS_ho    | Does anyone smoke in the home (yes,no)            | 1316   | 243   | 0.745 | 0.3762   | 1.4755   | 0.64    |
| smoke_hm  | # persons who smoke cigarettes in home            | 1316   | 243   | 1.123 | 0.4827   | 2.611    | 0.87    |
| SHS_wo    | Can smell smoking in the office (yes,no)          | 858    | 130   | 1.037 | 0.4653   | 2.3095   | 0.96    |
| smoke_ofc | At work, hours per day can smell smoking (yes,no) | 427    | 62    | 0.701 | 0.4191   | 1.1723   | 0.43    |
| COP       | Cotinine (ng/mL)                                  | 1309   | 242   | 0.97  | 0.7035   | 1.3386   | 0.9     |
| alc2day   | 2 or more drink per day (yes,no)                  | 1316   | 243   | 0.884 | 0.409    | 1.9122   | 0.86    |
| caf2day   | 2 or more caffeinated drink per day (yes,no)      | 1316   | 243   | 0.835 | 0.5567   | 1.2509   | 0.64    |

|              |                                      |      |     |           |            |            |          |
|--------------|--------------------------------------|------|-----|-----------|------------|------------|----------|
| vig          | Vigorous physical activity (no, yes) | 1316 | 243 | 0.8<br>49 | 0.318<br>5 | 2.261<br>6 | 0.8<br>6 |
| tetanus      | Tetanus Ab (U/mL)                    | 1316 | 243 | 1.1<br>03 | 0.752<br>1 | 1.617<br>4 | 0.7<br>7 |
| Hpylori      | Helicobacter pylori Ab (yes,no)      | 1276 | 237 | 1.1<br>44 | 0.781<br>8 | 1.673      | 0.7      |
| toxop        | Toxoplasmosis Ab (yes,no)            | 1211 | 221 | 0.9<br>65 | 0.706<br>2 | 1.317<br>5 | 0.8<br>9 |
| HSV1         | HSV1 Ab (yes,no)                     | 1310 | 243 | 1.1<br>69 | 0.746      | 1.831<br>1 | 0.7      |
| HSV2         | HSV2 Ab (yes,no)                     | 1304 | 242 | 0.6<br>93 | 0.398<br>7 | 1.205<br>9 | 0.4<br>5 |
| HA_ab        | Hepatitis A Ab (yes,no)              | 1313 | 242 | 0.8<br>74 | 0.500<br>2 | 1.526<br>8 | 0.7<br>8 |
| HBc_ab       | Hepatitis B core Ab (yes,no)         | 1314 | 243 | 0.8<br>99 | 0.333<br>2 | 2.423<br>1 | 0.8<br>9 |
| HBs_ab       | Hepatitis B surface Ab (yes,no)      | 101  | 22  | 4.5<br>71 | 0.541<br>1 | 38.61<br>6 | 0.5<br>4 |
| HC_ab        | Hepatitis C Ab (yes,no)              | 1310 | 242 | 0.3<br>73 | 0.069<br>2 | 2.004<br>7 | 0.5<br>1 |
| rubella      | Rubella Ab (yes,no)                  | 1313 | 242 | 1.0<br>11 | 0.831<br>1 | 1.230<br>6 | 0.9<br>5 |
| vcella       | Varicella Ab (yes,no)                | 1313 | 242 | 0.9<br>64 | 0.849      | 1.095<br>5 | 0.7<br>6 |
| ca_norm      | Serum normalized calcium (mmol/L)    | 1157 | 215 | 0.7<br>95 | 0.613<br>2 | 1.031<br>4 | 0.3<br>2 |
| ca_tot       | Serum total calcium (mmol/L)         | 1304 | 242 | 1.0<br>39 | 0.869      | 1.242<br>5 | 0.8<br>1 |
| seleniu<br>m | Serum selenium (mmol/L)              | 1314 | 243 | 0.9<br>59 | 0.788<br>8 | 1.166<br>6 | 0.8<br>1 |
| folate_s     | Serum folate (nmol/L)                | 1316 | 243 | 1.1<br>75 | 0.909<br>9 | 1.517<br>2 | 0.4<br>7 |
| folate_r     | RBC folate (nmol/L)                  | 1308 | 240 | 1.1<br>24 | 0.862<br>2 | 1.465<br>1 | 0.6<br>4 |
| vit_c        | Serum vit C (mmol/L)                 | 1302 | 240 | 0.9<br>96 | 0.757      | 1.309<br>5 | 0.9<br>9 |
| vit_a        | Serum vit A (umol/L)                 | 1307 | 243 | 0.8<br>32 | 0.639<br>5 | 1.081<br>8 | 0.4<br>3 |
| vit_e        | Serum vit E (umol/L)                 | 1307 | 243 | 0.9<br>09 | 0.760<br>7 | 1.086<br>1 | 0.5<br>7 |
| a_carot      | Serum alpha carotene (umol/L)        | 1307 | 243 | 0.9<br>4  | 0.611<br>8 | 1.444<br>8 | 0.8<br>7 |
| b_carot      | Serum beta carotene (umol/L)         | 1307 | 243 | 0.8<br>82 | 0.586<br>8 | 1.325<br>3 | 0.7<br>4 |
| b_crypto     | Serum beta cryptoxanthin (umol/L)    | 1307 | 243 | 1.0<br>3  | 0.749<br>2 | 1.416<br>2 | 0.9      |
| lut_zea      | Serum lutein/zeaxanthin (umol/L)     | 1307 | 243 | 0.9<br>65 | 0.794<br>4 | 1.172<br>6 | 0.8<br>4 |

|              |                                                |      |     |           |            |            |          |
|--------------|------------------------------------------------|------|-----|-----------|------------|------------|----------|
| lycopen<br>e | Serum lycopene (umol/L)                        | 1307 | 243 | 0.9<br>84 | 0.85       | 1.138<br>2 | 0.8<br>9 |
| sum_ret      | Serum sum retinyl esters (umol/L)              | 1307 | 243 | 0.8<br>94 | 0.776<br>4 | 1.029<br>8 | 0.3<br>6 |
| phosp        | Serum phosphorus (mmol/L)                      | 1310 | 242 | 1.2<br>27 | 0.896<br>7 | 1.678<br>5 | 0.4<br>5 |
| lead         | Serum lead (umol/L)                            | 1316 | 243 | 1.0<br>2  | 0.873<br>6 | 1.191<br>8 | 0.8<br>8 |
| cadmiu<br>m  | Urine cadmium (umol/L)                         | 1294 | 238 | 0.9<br>65 | 0.772<br>3 | 1.206<br>6 | 0.8<br>6 |
| iodine       | Urine iodine (ug/dL)                           | 1279 | 234 | 0.8<br>93 | 0.710<br>5 | 1.123<br>5 | 0.6<br>2 |
| vit_d        | Serum vitamin D (nmol/L)                       | 1315 | 243 | 0.9<br>44 | 0.708<br>1 | 1.257<br>8 | 0.8<br>2 |
| aspirin      | Taken aspirin in past month (yes,no)           | 1311 | 241 | 1.1<br>35 | 0.639<br>2 | 2.013<br>8 | 0.8      |
| aspi_mo      | # aspirin taken in the past month (yes,no)     | 510  | 98  | 0.9<br>97 | 0.627<br>8 | 1.582<br>4 | 0.9<br>9 |
| pct          | Taken paracetamol in past month (yes,no)       | 1310 | 240 | 0.9<br>08 | 0.630<br>4 | 1.308<br>9 | 0.7<br>7 |
| pct_mo       | # paracetamol taken in the past month (yes,no) | 376  | 63  | 0.7<br>88 | 0.466<br>1 | 1.333<br>8 | 0.6<br>4 |
| nsaid        | Taken NSAIDs in past month (yes,no)            | 1310 | 240 | 0.8<br>98 | 0.442<br>3 | 1.823<br>9 | 0.8<br>6 |
| nsa_mo       | # NSAIDs taken in the past month (yes,no)      | 171  | 29  | 0.8<br>66 | 0.502      | 1.495<br>3 | 0.7<br>7 |
| water_g      | Water (gm)                                     | 1273 | 234 | 0.7<br>42 | 0.548<br>9 | 1.001<br>7 | 0.2<br>7 |
| kcal         | Calories (kcal)                                | 1273 | 234 | 0.7<br>42 | 0.593<br>2 | 0.929<br>1 | 0.1<br>2 |
| prot_g       | Protein (gm)                                   | 1273 | 234 | 0.6<br>73 | 0.535<br>2 | 0.847<br>1 | 0.0<br>5 |
| totfat_g     | Total fats (gm)                                | 1273 | 234 | 0.7<br>46 | 0.627<br>7 | 0.887<br>5 | 0.0<br>5 |
| satfat_g     | Total saturated fatty acids (gm)               | 1273 | 234 | 0.7<br>15 | 0.584      | 0.874<br>4 | 0.0<br>5 |
| mufat_g      | Total monounsaturated fatty acids (gm)         | 1273 | 234 | 0.7<br>58 | 0.641<br>5 | 0.894<br>6 | 0.0<br>5 |
| pufat_g      | Total polyunsaturated fatty acids (gm)         | 1273 | 234 | 0.9<br>17 | 0.764<br>9 | 1.098<br>8 | 0.6<br>2 |
| chol_g       | Cholesterol (mg)                               | 1273 | 234 | 0.8<br>5  | 0.605<br>7 | 1.192<br>6 | 0.6<br>2 |
| carb_g       | Total carbohydrates (gm)                       | 1273 | 234 | 0.8<br>66 | 0.716<br>2 | 1.047<br>4 | 0.3<br>7 |
| fiber_g      | Dietary fiber (gm)                             | 1273 | 234 | 0.8<br>98 | 0.691<br>9 | 1.165<br>6 | 0.6<br>6 |
| alco_g       | Alcohol (gm)                                   | 1273 | 234 | 0.8<br>59 | 0.614<br>9 | 1.200<br>1 | 0.6<br>4 |

1  
2  
3  
4  
5  
6  
7  
8  
9  
10  
11  
12  
13  
14  
15  
16  
17  
18  
19  
20  
21  
22  
23  
24  
25  
26  
27  
28  
29  
30  
31  
32  
33  
34  
35  
36  
37  
38  
39  
40  
41  
42  
43  
44  
45  
46  
47  
48  
49  
50  
51  
52  
53  
54  
55  
56  
57  
58  
59  
60  
61  
62  
63  
64  
65

|          |                                         |      |     |       |        |        |      |
|----------|-----------------------------------------|------|-----|-------|--------|--------|------|
| vit_a_g  | Total vitamin A (IU)                    | 1273 | 234 | 0.805 | 0.7131 | 0.9086 | 0.05 |
| retino_g | Retinol (mcg)                           | 1273 | 234 | 0.871 | 0.6144 | 1.2346 | 0.67 |
| bcaro_g  | Beta-carotene (mcg)                     | 1273 | 234 | 0.833 | 0.723  | 0.9589 | 0.13 |
| vit_e_g  | Total alpha-tocopherol equivalents (mg) | 1273 | 234 | 0.882 | 0.7288 | 1.0671 | 0.45 |
| vit_c_g  | Vitamin C (mg)                          | 1273 | 234 | 0.942 | 0.8072 | 1.0992 | 0.67 |
| thia_g   | Thiamin (mg)                            | 1273 | 234 | 0.848 | 0.7199 | 0.999  | 0.26 |
| ribo_g   | Riboflavin (mg)                         | 1273 | 234 | 0.79  | 0.6325 | 0.988  | 0.23 |
| niac_g   | Niacin (mg)                             | 1273 | 234 | 0.704 | 0.5425 | 0.9142 | 0.12 |
| vit_b6_g | Vitamin B6 (mg)                         | 1273 | 234 | 0.816 | 0.6378 | 1.0437 | 0.35 |
| foia_g   | Folic acid (mcg)                        | 1273 | 234 | 0.873 | 0.7173 | 1.0637 | 0.43 |
| vitb12_g | Vitamin B12 (mcg)                       | 1273 | 234 | 0.88  | 0.7658 | 1.0117 | 0.3  |
| calc_g   | Calcium (mg)                            | 1273 | 234 | 0.857 | 0.7483 | 0.9809 | 0.19 |
| phos_g   | Phosphorous (mg)                        | 1273 | 234 | 0.7   | 0.5632 | 0.8701 | 0.05 |
| magn_g   | Magnesium (mg)                          | 1273 | 234 | 0.751 | 0.5635 | 0.9999 | 0.26 |
| iron_g   | Iron (mg)                               | 1273 | 234 | 0.788 | 0.6438 | 0.9649 | 0.18 |
| zinc_g   | Zinc (mg)                               | 1273 | 234 | 0.559 | 0.349  | 0.8953 | 0.16 |
| copp_g   | Copper (mg)                             | 1273 | 234 | 0.821 | 0.5838 | 1.1545 | 0.51 |
| sodi_g   | Sodium (mg)                             | 1273 | 234 | 0.838 | 0.6837 | 1.0272 | 0.32 |
| pots_g   | Potassium (mg)                          | 1273 | 234 | 0.801 | 0.6381 | 1.0061 | 0.27 |
| cfiber_g | Crude Fiber (gm)                        | 1273 | 234 | 0.89  | 0.7372 | 1.0748 | 0.48 |
| ash_g    | Ash (gm)                                | 1273 | 234 | 0.796 | 0.6379 | 0.993  | 0.25 |
| cafe_g   | Caffeine (mg)                           | 1273 | 234 | 0.753 | 0.6019 | 0.9428 | 0.14 |
| sele_g   | Selenium (mcg)                          | 1273 | 234 | 0.738 | 0.562  | 0.9679 | 0.2  |
| pantho_g | Pantothenic acid (mg)                   | 1273 | 234 | 0.869 | 0.6935 | 1.0889 | 0.48 |

|          |                                |      |     |       |        |        |      |
|----------|--------------------------------|------|-----|-------|--------|--------|------|
| a_toco_g | Alpha-tocopherol (mg)          | 1273 | 234 | 0.903 | 0.7318 | 1.115  | 0.62 |
| b_toco_g | Beta-tocopherol (mg)           | 1273 | 234 | 0.998 | 0.8354 | 1.1921 | 0.99 |
| g_toco_g | Gamma-tocopherol (mg)          | 1273 | 234 | 0.861 | 0.7546 | 0.9825 | 0.19 |
| d_toco_g | Delta-tocopherol (mg)          | 1273 | 234 | 0.864 | 0.7625 | 0.979  | 0.18 |
| vit_d_g  | Vitamin D (mcg)                | 1273 | 234 | 0.897 | 0.7814 | 1.0293 | 0.36 |
| sfa40_g  | SFA 4:0 (gm)                   | 1273 | 234 | 0.824 | 0.6702 | 1.0127 | 0.3  |
| sfa60_g  | SFA 6:0 (gm)                   | 1273 | 234 | 0.865 | 0.6996 | 1.0697 | 0.43 |
| sfa80_g  | SFA 8:0 (gm)                   | 1273 | 234 | 0.884 | 0.6969 | 1.1216 | 0.59 |
| sfa100_g | SFA 10:0 (gm)                  | 1273 | 234 | 0.808 | 0.6342 | 1.0296 | 0.32 |
| sfa120_g | SFA 12:0 (gm)                  | 1273 | 234 | 0.925 | 0.7522 | 1.1367 | 0.67 |
| sfa140_g | SFA 14:0 (gm)                  | 1273 | 234 | 0.743 | 0.5801 | 0.9513 | 0.17 |
| sfa160_g | SFA 16:0 (gm)                  | 1273 | 234 | 0.714 | 0.5812 | 0.8769 | 0.05 |
| sfa170_g | SFA 17:0 (gm)                  | 1273 | 234 | 0.84  | 0.7043 | 1.0028 | 0.27 |
| sfa180_g | SFA 18:0 (gm)                  | 1273 | 234 | 0.721 | 0.6013 | 0.8651 | 0.05 |
| sfa200_g | SFA 20:0 (gm)                  | 1273 | 234 | 1.04  | 0.9007 | 1.2006 | 0.77 |
| sfa220_g | SFA 22:0 (gm)                  | 1273 | 234 | 1.048 | 0.9261 | 1.1857 | 0.67 |
| mfa141_g | MFA 14:1 (gm)                  | 1273 | 234 | 0.659 | 0.5069 | 0.857  | 0.06 |
| mfa161_g | MFA 16:1 (gm)                  | 1273 | 234 | 0.724 | 0.5449 | 0.9626 | 0.19 |
| mfa181_g | Oleic acid (MFA 18:1) (gm)     | 1273 | 234 | 0.767 | 0.652  | 0.9032 | 0.05 |
| mfa201_g | MFA 20:1 (gm)                  | 1273 | 234 | 0.802 | 0.6781 | 0.9494 | 0.13 |
| mfa221_g | MFA 22:1 (gm)                  | 1273 | 234 | 1.001 | 0.799  | 1.2539 | 0.99 |
| pfa182_g | Linoleic acid (PFA 18:2) (gm)  | 1273 | 234 | 0.927 | 0.7789 | 1.104  | 0.64 |
| pfa183_g | Linolenic acid (PFA 18:3) (gm) | 1273 | 234 | 0.913 | 0.7281 | 1.1458 | 0.67 |
| pfa184_g | PFA 18:4 (gm)                  | 1273 | 234 | 0.892 | 0.7662 | 1.0375 | 0.37 |

1  
2  
3  
4  
5  
6  
7  
8  
9  
10  
11  
12  
13  
14  
15  
16  
17  
18  
19  
20  
21  
22  
23  
24  
25  
26  
27  
28  
29  
30  
31  
32  
33  
34  
35  
36  
37  
38  
39  
40  
41  
42  
43  
44  
45  
46  
47  
48  
49  
50  
51  
52  
53  
54  
55  
56  
57  
58  
59  
60  
61  
62  
63  
64  
65

|          |                                    |      |     |       |        |        |      |
|----------|------------------------------------|------|-----|-------|--------|--------|------|
| pfa204_g | PFA 20:4 (gm)                      | 1273 | 234 | 0.749 | 0.5503 | 1.0206 | 0.3  |
| pfa205_g | PFA 20:5 (gm)                      | 1273 | 234 | 0.914 | 0.7426 | 1.1253 | 0.64 |
| pfa225_g | PFA 22:5 (gm)                      | 1273 | 234 | 0.817 | 0.6302 | 1.0588 | 0.36 |
| pfa226_g | PFA 22:6 (gm)                      | 1273 | 234 | 0.883 | 0.7711 | 1.0102 | 0.3  |
| gluc_g   | Glucose (gm)                       | 1273 | 234 | 0.977 | 0.8435 | 1.1325 | 0.86 |
| fruc_g   | Fructose (gm)                      | 1272 | 234 | 1.051 | 0.8667 | 1.2736 | 0.77 |
| gala_g   | Galactose (gm)                     | 1273 | 234 | 1.16  | 0.9473 | 1.4214 | 0.4  |
| sucr_g   | Sucrose (gm)                       | 1273 | 234 | 0.965 | 0.8585 | 1.0856 | 0.74 |
| lact_g   | Lactose (gm)                       | 1273 | 234 | 0.878 | 0.7453 | 1.0339 | 0.36 |
| malt_g   | Maltose (gm)                       | 1273 | 234 | 0.965 | 0.8392 | 1.1102 | 0.77 |
| ifiber_g | Water insoluble dietary fiber (gm) | 1273 | 234 | 0.939 | 0.7265 | 1.2141 | 0.78 |
| sfiber_g | Water soluble dietary fiber (gm)   | 1273 | 234 | 0.845 | 0.6672 | 1.0694 | 0.41 |
| pect_g   | Pectin (gm)                        | 1273 | 234 | 1.026 | 0.8147 | 1.2917 | 0.89 |
| star_g   | Starch (gm)                        | 1273 | 234 | 0.805 | 0.616  | 1.0508 | 0.35 |
| aspar_g  | Aspartame (mg)                     | 1273 | 234 | 0.705 | 0.5704 | 0.871  | 0.05 |
| tryp_g   | Tryptophan (gm)                    | 1273 | 234 | 0.651 | 0.5307 | 0.7974 | 0.05 |
| thre_g   | Threonine (gm)                     | 1273 | 234 | 0.651 | 0.5307 | 0.7974 | 0.05 |
| isoleu_g | Isoleucine (gm)                    | 1273 | 234 | 0.68  | 0.5455 | 0.8486 | 0.05 |
| leuc_g   | Leucine (gm)                       | 1273 | 234 | 0.681 | 0.5475 | 0.846  | 0.05 |
| lysin_g  | Lysine(gm)                         | 1273 | 234 | 0.684 | 0.5468 | 0.8545 | 0.05 |
| meth_g   | Methionine (gm)                    | 1273 | 234 | 0.685 | 0.5443 | 0.861  | 0.05 |
| cyst_g   | Cystine (gm)                       | 1273 | 234 | 0.716 | 0.5717 | 0.8958 | 0.08 |
| phen_g   | Phenylalanine (gm)                 | 1273 | 234 | 0.695 | 0.5586 | 0.8635 | 0.05 |
| tyro_g   | Tyrosine (gm)                      | 1273 | 234 | 0.673 | 0.5449 | 0.8307 | 0.05 |

1  
2  
3  
4  
5  
6  
7  
8  
9  
10  
11  
12  
13  
14  
15  
16  
17  
18  
19  
20  
21  
22  
23  
24  
25  
26  
27  
28  
29  
30  
31  
32  
33  
34  
35  
36  
37  
38  
39  
40  
41  
42  
43  
44  
45  
46  
47  
48  
49  
50  
51  
52  
53  
54  
55  
56  
57  
58  
59  
60  
61  
62  
63  
64  
65

|          |                                       |      |     |       |        |        |      |
|----------|---------------------------------------|------|-----|-------|--------|--------|------|
| valin_g  | Valine (gm)                           | 1273 | 234 | 0.689 | 0.5561 | 0.8532 | 0.05 |
| argin_g  | Arginine (gm)                         | 1273 | 234 | 0.69  | 0.5496 | 0.8675 | 0.05 |
| histi_g  | Histidine (gm)                        | 1273 | 234 | 0.709 | 0.577  | 0.8724 | 0.05 |
| alan_g   | Alanine (gm)                          | 1273 | 234 | 0.675 | 0.5312 | 0.8571 | 0.05 |
| aspac_g  | Aspartic Acid (gm)                    | 1273 | 234 | 0.696 | 0.5425 | 0.8927 | 0.08 |
| glutac_g | Glutamic Acid (gm)                    | 1273 | 234 | 0.658 | 0.5388 | 0.8026 | 0.05 |
| glyc_g   | Glycine (gm)                          | 1273 | 234 | 0.667 | 0.5299 | 0.8396 | 0.05 |
| proli_g  | Proline (gm)                          | 1273 | 234 | 0.682 | 0.566  | 0.8224 | 0.05 |
| serin_g  | Serine (gm)                           | 1273 | 234 | 0.707 | 0.5763 | 0.8669 | 0.05 |
| sacch_g  | Saccharin (mg)                        | 1273 | 234 | 1.018 | 0.8483 | 1.2218 | 0.9  |
| anprot_g | Animal Protein (gm)                   | 1273 | 234 | 0.694 | 0.5517 | 0.8722 | 0.06 |
| vprot_g  | Vegetable Protein (gm)                | 1273 | 234 | 0.845 | 0.6607 | 1.0816 | 0.43 |
| oxal_g   | Oxalic Acid (mg)                      | 1273 | 234 | 0.945 | 0.8671 | 1.0299 | 0.45 |
| phyt_g   | Phytic Acid (mg)                      | 1273 | 234 | 0.945 | 0.7602 | 1.1749 | 0.77 |
| p_tfat   | Energy from total fat (%kcal)         | 1273 | 234 | 0.855 | 0.6971 | 1.0477 | 0.37 |
| p_sfat   | Energy from saturated fat (%kcal)     | 1273 | 234 | 0.802 | 0.6224 | 1.0323 | 0.32 |
| p_msfat  | Energy from monosaturated fat (%kcal) | 1273 | 234 | 0.838 | 0.6742 | 1.0414 | 0.35 |
| p_psfat  | Energy from polysaturated fat (%kcal) | 1273 | 234 | 1.114 | 0.9285 | 1.3365 | 0.51 |
| p_prot   | Energy from protein (%kcal)           | 1273 | 234 | 0.94  | 0.7694 | 1.1473 | 0.74 |
| p_carb   | Energy from carbohydrate (%kcal)      | 1273 | 234 | 1.231 | 0.9894 | 1.5311 | 0.29 |
| p_alc    | Energy from alcohol (%kcal)           | 1273 | 234 | 0.938 | 0.6686 | 1.317  | 0.84 |
| gra_hei  | Grains, HEI Score                     | 1273 | 234 | 0.806 | 0.6631 | 0.9799 | 0.2  |
| fru_hei  | Fruits, HEI Score                     | 1273 | 234 | 1.092 | 0.8705 | 1.3696 | 0.67 |
| veg_hei  | Vegetables, HEI Score                 | 1273 | 234 | 0.979 | 0.7129 | 1.3451 | 0.94 |



1  
2  
3  
4  
5  
6  
7  
8  
9  
10  
11  
12  
13  
14  
15  
16  
17  
18  
19  
20  
21  
22  
23  
24  
25  
26  
27  
28  
29  
30  
31  
32  
33  
34  
35  
36  
37  
38  
39  
40  
41  
42  
43  
44  
45  
46  
47  
48  
49  
50  
51  
52  
53  
54  
55  
56  
57  
58  
59  
60  
61  
62  
63  
64  
65

|              |                                                                 |      |     |           |            |            |          |
|--------------|-----------------------------------------------------------------|------|-----|-----------|------------|------------|----------|
| dai_hei      | Dairy, HEI Score                                                | 1273 | 234 | 0.9<br>14 | 0.690<br>7 | 1.210<br>5 | 0.7<br>4 |
| mea_hei      | Meats, HEI Score                                                | 1273 | 234 | 0.8<br>94 | 0.703<br>5 | 1.136<br>1 | 0.6<br>2 |
| fat_hei      | Fats, HEI Score                                                 | 1273 | 234 | 1.1<br>42 | 0.988<br>7 | 1.320<br>2 | 0.3      |
| sfa_hei      | Saturated Fat, HEI Score                                        | 1273 | 234 | 1.1<br>85 | 0.976<br>2 | 1.439      | 0.3<br>2 |
| cho_hei      | Cholesterol, HEI Score                                          | 1273 | 234 | 1.1<br>16 | 0.823<br>9 | 1.511<br>4 | 0.6<br>9 |
| sod_hei      | Sodium, HEI Score                                               | 1273 | 234 | 1.0<br>83 | 0.925<br>9 | 1.267<br>8 | 0.6      |
| HEISCO<br>RE | Healthy Eating Index Score                                      | 1273 | 234 | 1.1<br>3  | 0.918      | 1.391<br>2 | 0.5<br>1 |
| phone_<br>wk | # talk on the phone with family, friends or neighbours per week | 1243 | 236 | 1.0<br>67 | 0.866<br>8 | 1.314      | 0.7<br>4 |
| meet_yr      | # get together with friends or relatives or neighbours per year | 1316 | 243 | 0.8<br>68 | 0.628<br>2 | 1.198<br>9 | 0.6<br>4 |

**Supplementary Table S3.** Descriptive characteristics of study participants in NHANES III (discovery set) by calculated free testosterone deficiency

|                                                       | < 225 calculate free testosterone (N= 257) | ≥ 225 calculated free testosterone (N= 1047) | P-value |
|-------------------------------------------------------|--------------------------------------------|----------------------------------------------|---------|
| <b>Age – mean (SE)</b>                                | 51.40 (1.08)                               | 41.36 (0.73)                                 | 0.0001  |
| <b>Race (%)</b>                                       |                                            |                                              | 0.40    |
| Non-Hispanic white                                    | 76.72                                      | 78.89                                        |         |
| Non-Hispanic black                                    | 9.54                                       | 9.52                                         |         |
| Mexican-American                                      | 4.03                                       | 4.65                                         |         |
| Others                                                | 9.71                                       | 6.94                                         |         |
| <b>Poverty-to-income ratio (PIR) (%)</b>              |                                            |                                              | 0.01    |
| <1                                                    | 3.94                                       | 10.75                                        |         |
| 1-2                                                   | 21.16                                      | 18.30                                        |         |
| 2-3                                                   | 32.09                                      | 19.74                                        |         |
| ≥3                                                    | 42.81                                      | 51.20                                        |         |
| <b>Body mass index (kg/m<sup>2</sup>) – mean (SD)</b> | 28.70 (0.70)                               | 25.93 (0.22)                                 | 0.03    |
| <b>Metabolic disorder (%)</b>                         |                                            |                                              |         |
| Hypertension                                          | 61.69                                      | 37.37                                        | <0.0001 |
| Diabetes                                              | 19.17                                      | 9.95                                         | 0.0006  |
| Low HDL-cholesterol                                   | 40.73                                      | 30.89                                        | 0.91    |
| Triglyceridemia                                       | 49.02                                      | 28.84                                        | 0.03    |
| <b>Hormone levels – mean (SD)</b>                     |                                            |                                              |         |
| Testosterone (ng/mL)                                  | 2.62 (0.10)                                | 5.91 (0.10)                                  | <0.0001 |
| SHBG (nmol/L)                                         | 32.30 (1.95)                               | 39.24 (0.78)                                 | <0.0001 |
| Estradiol (ng/mL)                                     | 31.33 (1.64)                               | 38.22 (0.63)                                 | 0.0002  |

1  
2  
3  
4  
5  
6  
7  
8  
9  
10  
11  
12  
13  
14  
15  
16  
17  
18  
19  
20  
21  
22  
23  
24  
25  
26  
27  
28  
29  
30  
31  
32  
33  
34  
35  
36  
37  
38  
39  
40  
41  
42  
43  
44  
45  
46  
47  
48  
49  
50  
51  
52  
53  
54  
55  
56  
57  
58  
59  
60  
61  
62  
63  
64  
65

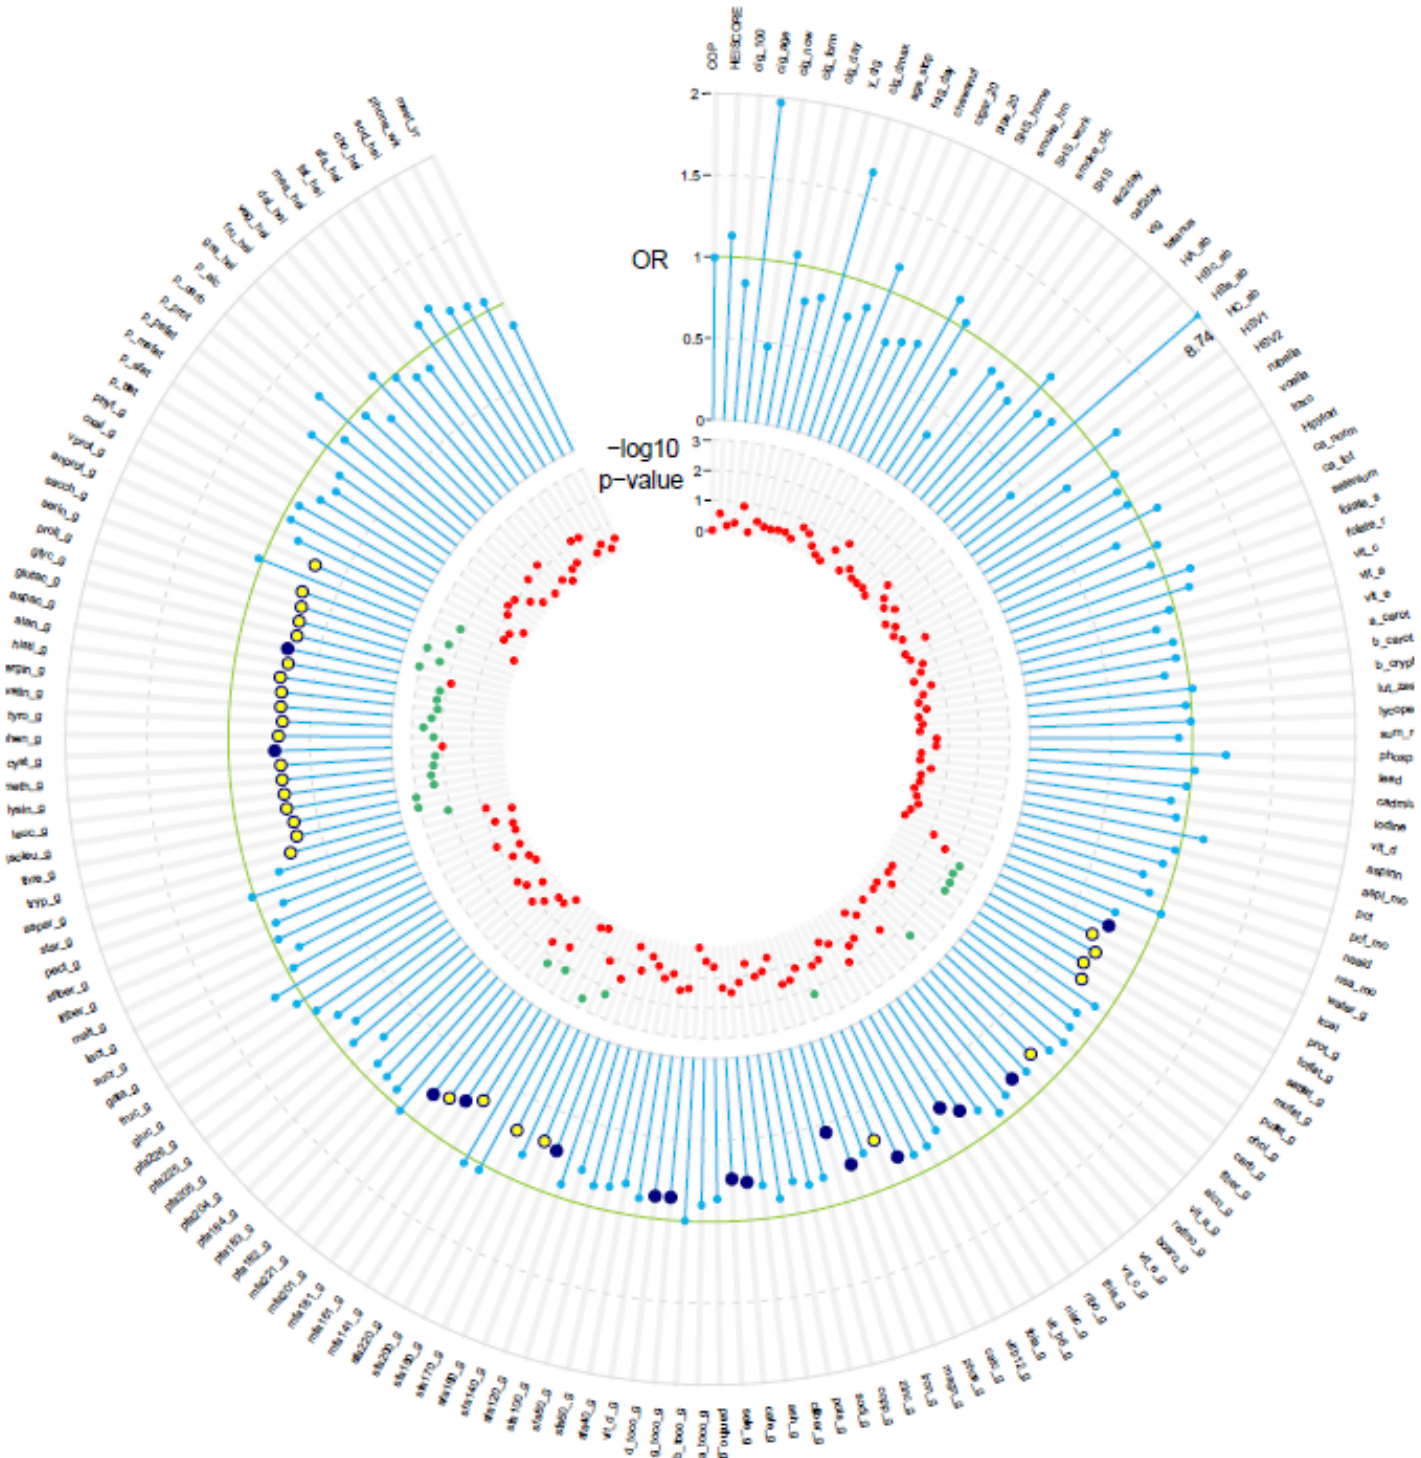

**Supplementary Figure S1.** Circle Manhattan plot shows the associations between nutrition and lifestyle factors and T deficiency. Factors were ordered based on the size of effects (odds ratio). For abbreviations of investigated factors, see Supplementary Table S1. Filled yellow dots represent those significant associations in multiple comparisons in the discovery set (FDR < 5%) and filled blue dots represent P value < 0.05 in the replication set that were considered valid.

1  
2  
3  
4  
5  
6  
7  
8  
9  
10  
11  
12  
13  
14  
15  
16  
17  
18  
19  
20  
21  
22  
23  
24  
25  
26  
27  
28  
29  
30  
31  
32  
33  
34  
35  
36  
37  
38  
39  
40  
41  
42  
43  
44  
45  
46  
47  
48  
49  
50  
51  
52  
53  
54  
55  
56  
57  
58  
59  
60  
61  
62  
63  
64  
65

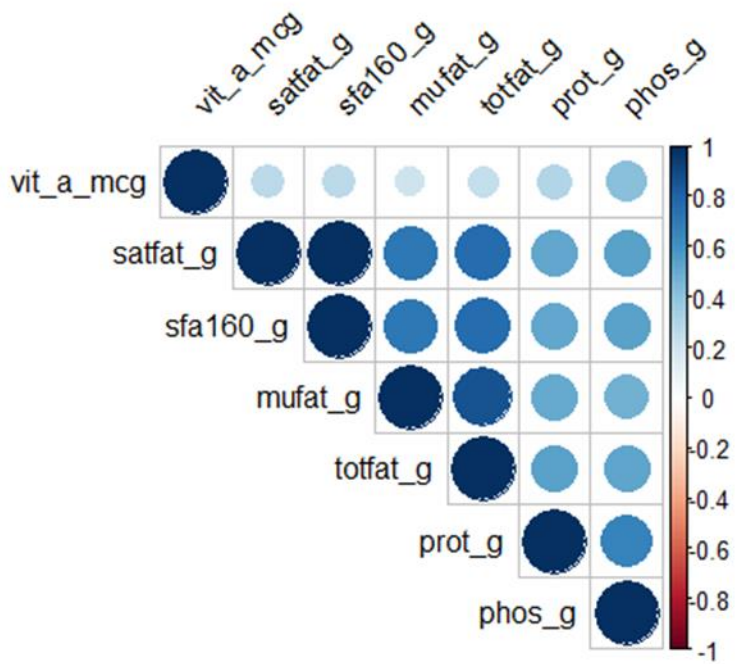

**Supplementary Figure S2.** Correlation between validated nutrition and lifestyle factors.

# Factor Analysis

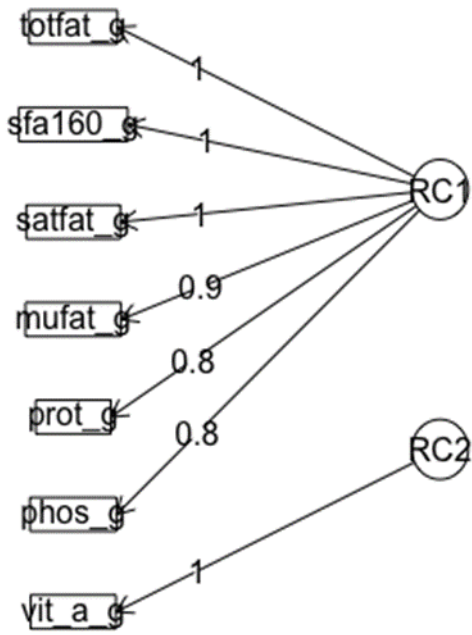

Supplementary Figure S3. Principal component factors analysis.
